# Supplementary material for: Facile synthesis of SnO2 nanoparticles for improved formaldehyde detection
Source: Royal Society of Chemistry journal article supplement (doi:10.1039/c8nj01923a), 2018-01-01
Supplement: c8nj01923a1.pdf [file c8nj01923a1.pdf]

## Supplementary Information

### **Facile synthesis of SnO<sub>2</sub> nanoparticles for improved formaldehyde detection**

Tianye Yang<sup>a</sup>, Mingming Zhu<sup>a</sup>, Kuikun Gu<sup>a</sup>, Chengbo Zhai<sup>a</sup>, Qi Zhao<sup>a</sup>, Xiaodong Yang<sup>†b</sup> and Mingzhe Zhang<sup>\*a</sup>

<sup>a</sup>State key laboratory of Superhard materials, Jilin University, Changchun 130012, People's Republic of China, E-mail: [zhangmz@jlu.edu.cn](mailto:zhangmz@jlu.edu.cn)

<sup>b</sup>School of Mechanical Engineering, Jilin Engineering Normal University, Changchun 130052, People's Republic of China, E-mail: [y86908051@126.com](mailto:y86908051@126.com)

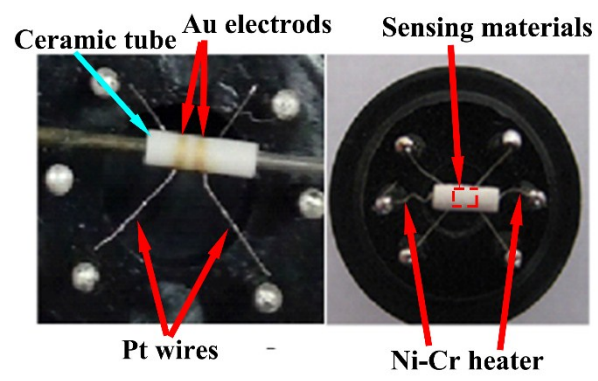

**Fig. S1** Schematic image of as fabricated SnO<sub>2</sub> NPs based sensor.
